# Supplementary material
Source: MDPI journal article supplement (https://www.mdpi.com/2071-1050/12/6/2308)
Supplement: s1 [file s1]

*Table S1: Variables with Data Types and Coding Schema*

| Variable                   | Data Type   | Coding                                                                             |
|----------------------------|-------------|------------------------------------------------------------------------------------|
| Urbanicity                 | Dichotomous | Urban = -0.5; Rural = +0.5                                                         |
| IF1: Benefits              | Interval    | Very Negative = 0, Very Positive = 1                                               |
| IF2: Nuisances             | Interval    | Very Negative = 0, Very Positive = 1                                               |
| IF3: Environmental Risks   | Interval    | Very Negative = 0, Very Positive = 1                                               |
| Earthquake Experience      | Interval    | No Adverse Earthquake Experience = 0,<br>Extreme Adverse Earthquake Experience = 1 |
| Local Oil & Gas production | Interval    | None = 0; A Great Deal = 1                                                         |
| Impact of HF               | Interval    | Very Negative = 0; Very Positive = 1                                               |
| Support for HF             | Interval    | Strongly Oppose = 0; Strongly Support = 1                                          |
| Education                  | Interval    | Some High School = 0; Advanced Degree = 1                                          |
| Age                        | Continuous  | Centered at 55.1 Years Old                                                         |
| Gender                     | Dichotomous | Male = -0.5; Female = +0.5                                                         |
